# Supplementary material for: Enhancement of the solubility and antioxidant capacity of α-linolenic acid using an oil in water microemulsion
Source: Royal Society of Chemistry journal article supplement (doi:10.1039/c7fo00663b), 2017-01-01
Supplement: c7fo00663b1.pdf [file c7fo00663b1.pdf]

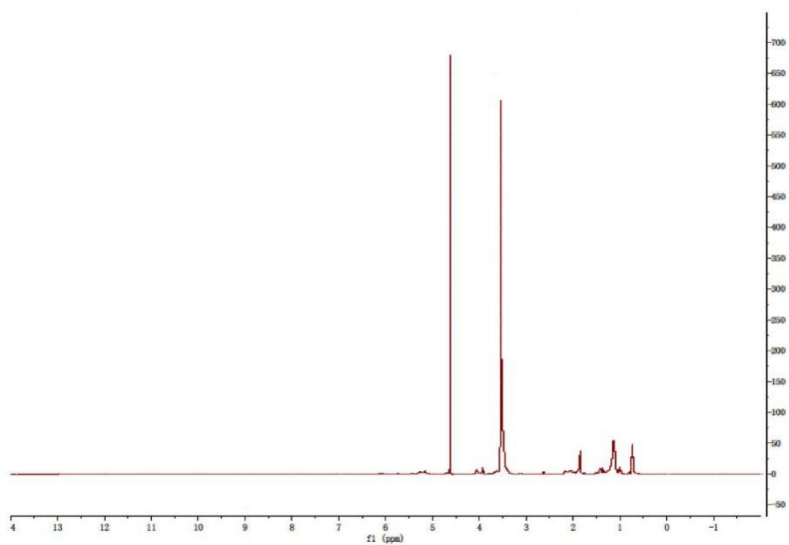

(a)

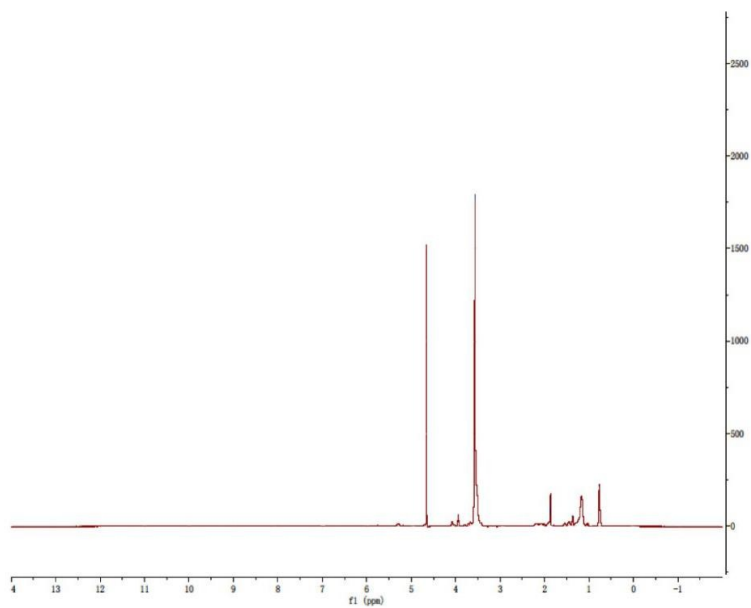

(b)

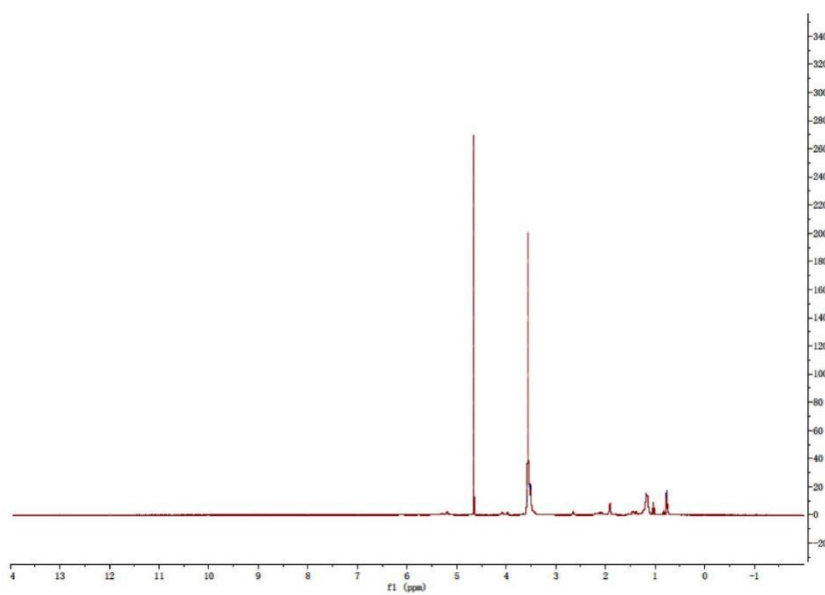

(c)

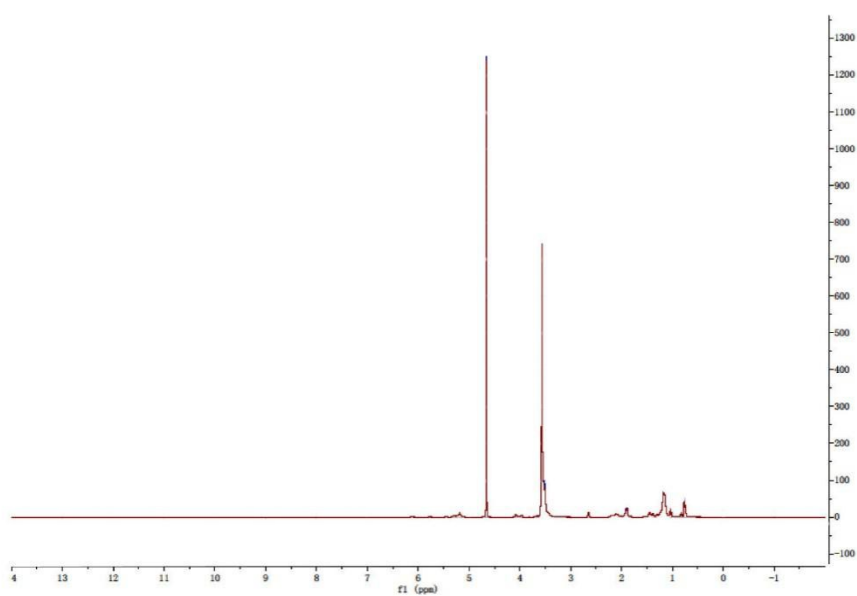

(d)

**Fig. 1.** The  $^1\text{H}$ -NMR spectra of ALA-ME: (a)Free ALA Microemulsion; (b)ALA-ME with 15% ALA content; (c)ALA-ME with 20% ALA content; (d)ALA-ME with 25% ALA content
